# Supplementary material for: Molecular mechanism of the MORC4 ATPase activation
Source: PubMed Central journal article supplement (PMC7596504; doi:10.1038/s41467-020-19278-8), 2020-10-29
Supplement: 41467_2020_19278_MOESM4_ESM.pdf [file 41467_2020_19278_MOESM4_ESM.pdf]

## **Description of Additional Supplementary Files**

**Supplementary Data 1:** List of averages and standard deviations for peptides in histone peptide microarrays.
