# Supplementary material for: Molecular mechanism of the MORC4 ATPase activation
Source: PubMed Central journal article supplement (PMC7596504; doi:10.1038/s41467-020-19278-8), 2020-10-29
Supplement: 41467_2020_19278_MOESM5_ESM.pdf [file 41467_2020_19278_MOESM5_ESM.pdf]

| Average | SD    | Peptide                                        |
|---------|-------|------------------------------------------------|
| 0.336   | 0.070 | H3 (1-20)                                      |
| 0.457   | 0.084 | H3K14ac                                        |
| 0.417   | 0.072 | H3K9ac                                         |
| 0.409   | 0.077 | H3K4ac                                         |
| 0.320   | 0.091 | H3K4ac + K14ac                                 |
| 0.299   | 0.093 | H3K9ac + K14ac                                 |
| 0.315   | 0.085 | H3K4ac + K9ac                                  |
| 0.198   | 0.084 | H3K4ac + K9ac + K14ac                          |
| 0.254   | 0.097 | H3K18ac                                        |
| 0.150   | 0.077 | H3K14ac + K18ac                                |
| 0.277   | 0.097 | H3K9ac + K18ac                                 |
| 0.284   | 0.082 | H3K4ac + K18ac                                 |
| 0.356   | 0.110 | H3K9ac + K14ac + K18ac                         |
| 0.255   | 0.079 | H3K4ac + K14ac + K18ac                         |
| 0.383   | 0.096 | H3K4ac + K9ac + K18ac                          |
| 0.392   | 0.092 | H3K4ac + K9ac + K14ac + K18ac                  |
| 0.719   | 0.129 | H3K4me3                                        |
| 0.907   | 0.096 | H3K4me3 + K9ac                                 |
| 0.533   | 0.102 | H3K4me3 + K14ac                                |
| 0.584   | 0.073 | H3K4me3 + K18ac                                |
| 0.580   | 0.102 | H3K4me3 + K9ac + K14ac                         |
| 0.456   | 0.138 | H3K4me3 + K9ac + K18ac                         |
| 0.570   | 0.161 | H3K4me3 + K14ac + K18ac                        |
| 0.708   | 0.149 | H3K4me3 + K9ac + K14ac + K18ac                 |
| 0.326   | 0.073 | H3T3p + K4me3 + K9ac + K14ac + K18ac           |
| 0.368   | 0.085 | H3T3p + K4me3                                  |
| 0.273   | 0.083 | H3R2me2a + T3p + K4me3 + K9ac + K14ac + K18ac  |
| 0.169   | 0.070 | H3R2me2a + T3p + K4me3                         |
| 0.687   | 0.105 | H3R2me2a + K4me3                               |
| 0.490   | 0.078 | H3K4me2                                        |
| 0.441   | 0.110 | H3K4me2 + K9ac + K14ac + K18ac                 |
| 0.349   | 0.108 | H3K4me1                                        |
| 0.264   | 0.063 | H3K4me1 + K9ac + K14ac + K18ac                 |
| 0.203   | 0.107 | H3S10p                                         |
| 0.202   | 0.100 | H3K4ac + K9ac + S10p + K14ac + K18ac           |
| 0.501   | 0.092 | H3K4me3 + S10p                                 |
| 0.420   | 0.113 | H3K4me3 + K9ac + S10p + K14ac + K18ac          |
| 0.595   | 0.117 | H3R2me2a + K4me3 + S10p                        |
| 0.663   | 0.080 | H3R2me2a + K4me3 + K9ac + S10p + K14ac + K18ac |
| 0.498   | 0.092 | H3K9me3                                        |
| 0.459   | 0.107 | H3K4ac + K9me3 + K14ac + K18ac                 |
| 0.560   | 0.103 | H3K4me2 + K9ac + K18ac                         |
| 0.420   | 0.107 | H3K4me1 + K9ac + K18ac                         |
| 0.246   | 0.120 | H3R2me2a                                       |
| 0.302   | 0.093 | H3R2me2a + K4ac + K9ac + K14ac + K18ac         |
| 0.423   | 0.070 | H3R2me2a + K4me3 + K9ac + K14ac + K18ac        |
| 0.483   | 0.159 | H3R2me1 + K4me3                                |

|       |       |                                                |
|-------|-------|------------------------------------------------|
| 0.568 | 0.106 | H3R2me1 + K4me3 + K9ac + K14ac + K18ac         |
| 0.413 | 0.110 | H3Cit2                                         |
| 0.638 | 0.117 | H3Cit2 + K4me3                                 |
| 0.789 | 0.171 | H3Cit2 + K4me3 + K9ac + K14ac + K18ac          |
| 0.183 | 0.030 | H3Cit2 + K4ac + K9ac + K14ac + K18ac           |
| 0.206 | 0.103 | H3T3p                                          |
| 0.218 | 0.099 | H4 (1-23)                                      |
| 0.117 | 0.092 | H4K5ac + K8ac + K12ac + K16ac                  |
| 0.321 | 0.114 | H3R2me2a + K4me2                               |
| 0.391 | 0.091 | H3R2me2s + K4me2                               |
| 0.527 | 0.089 | H3R2me1 + K4me2                                |
| 0.625 | 0.114 | H3Cit2 + K4me2                                 |
| 0.302 | 0.061 | H3K4N3                                         |
| 0.466 | 0.081 | H4K5ac                                         |
| 0.379 | 0.111 | H4K8ac                                         |
| 0.397 | 0.059 | H4K12ac                                        |
| 0.336 | 0.107 | H4K16ac                                        |
| 0.354 | 0.111 | H4K5ac + K12ac                                 |
| 0.306 | 0.103 | H4K8ac + K16ac                                 |
| 0.281 | 0.088 | H4K5ac + K8ac + K12ac                          |
| 0.269 | 0.102 | H4R3me2a                                       |
| 0.160 | 0.105 | H4R3me2s                                       |
| 0.222 | 0.098 | H4R3me1                                        |
| 0.114 | 0.086 | H4S1p + R3me2a                                 |
| 0.064 | 0.071 | H4S1p + R3me2s                                 |
| 0.262 | 0.087 | H4S1p + R3me1                                  |
| 0.247 | 0.117 | H4R3me2a + K5ac + K8ac + K12ac + K16ac + K20ac |
| 0.323 | 0.115 | H4R3me2s + K5ac + K8ac + K12ac + K16ac + K20ac |
| 0.427 | 0.106 | H4R3me1 + K5ac + K8ac + K12ac + K16ac + K20ac  |
| 0.382 | 0.098 | H4K20me3                                       |
| 0.124 | 0.103 | H4K20me2                                       |
| 0.098 | 0.097 | H4K20me1                                       |
| 0.251 | 0.103 | H4K12ac + K16ac + K20me3                       |
| 0.277 | 0.085 | H4K12ac + K16ac + K20me2                       |
| 0.224 | 0.101 | H4K12ac + K16ac + K20me1                       |
| 0.352 | 0.089 | H4K12ac + K16ac                                |
| 0.752 | 0.100 | H3K4me3 + R8me2s + K9me3                       |
| 0.189 | 0.119 | H3 (15-41)                                     |
| 0.384 | 0.081 | H3K18me3                                       |
| 0.438 | 0.124 | H3K36me3                                       |
| 0.390 | 0.087 | H3K18me3 + K36me3                              |
| 0.811 | 0.100 | H3K4me3 + R8me2a + K9me3                       |
| 0.381 | 0.107 | H4 (11-27)                                     |
| 0.358 | 0.101 | H3 (74-84) N-ac                                |
| 0.427 | 0.086 | H3K79me3                                       |
| 0.279 | 0.107 | H3K79me2                                       |
| 0.197 | 0.109 | H3K79me1                                       |
| 0.257 | 0.102 | H3 (74-84)                                     |

|       |       |                                         |
|-------|-------|-----------------------------------------|
| 0.098 | 0.094 | H3K36me3 (27-45)                        |
| 0.273 | 0.093 | H3K36me2 (27-45)                        |
| 0.213 | 0.105 | H3K36ac (27-45)                         |
| 0.229 | 0.099 | H3 (27-45)                              |
| 0.282 | 0.110 | H3T3p                                   |
| 0.186 | 0.078 | H3.3K36me1                              |
| 0.226 | 0.096 | H3K9me2 + K27me2                        |
| 0.554 | 0.118 | H3K4me3 + K9me3                         |
| 0.407 | 0.119 | H3K9me2                                 |
| 0.335 | 0.098 | H3K9me1                                 |
| 0.328 | 0.076 | K3K4me1 + K18ac                         |
| 0.321 | 0.086 | H3T11p                                  |
| 0.243 | 0.099 | H3K18me3                                |
| 0.364 | 0.105 | H3K18me2                                |
| 0.300 | 0.080 | H3K18me1                                |
| 0.354 | 0.109 | H3R8me1                                 |
| 0.393 | 0.093 | H3R8me2a                                |
| 0.203 | 0.136 | H3R8me2s                                |
| 0.254 | 0.075 | H3K9ac + S10p                           |
| 0.176 | 0.080 | H3K9me3 + S10p                          |
| 0.220 | 0.080 | H3K9me2 + S10p                          |
| 0.290 | 0.108 | H3K9me1 + S10p                          |
| 0.467 | 0.037 | H3K4me3 + K9ac + S10p                   |
| 0.458 | 0.077 | H3R17me2a                               |
| 0.454 | 0.107 | H3R17me2s                               |
| 0.432 | 0.070 | H3R17me1                                |
| 0.246 | 0.086 | H3K14me2                                |
| 0.292 | 0.109 | H3K14me3                                |
| 0.808 | 0.106 | H3R2me2s + K4me3                        |
| 0.375 | 0.103 | H3K18ac (1-25)                          |
| 0.340 | 0.139 | H3R17me2a (1-25)                        |
| 0.318 | 0.109 | H3R17me2a + K18ac (1-25)                |
| 0.459 | 0.118 | H3 (1-25)                               |
| 0.238 | 0.119 | H3T6p                                   |
| 0.247 | 0.097 | H3K4me3 + T6p                           |
| 0.214 | 0.107 | H3K4me2 + T6p                           |
| 0.096 | 0.079 | H3T6p + K9ac + K14ac + K18ac            |
| 0.198 | 0.094 | H3K4me3 + T6p + K9ac + K14ac + K18ac    |
| 0.234 | 0.082 | H3K4me2 + T6p + K9ac + K14ac + K18ac    |
| 0.353 | 0.098 | H3K18ac + K23ac + K27ac                 |
| 0.201 | 0.037 | H3K18ac + K23ac + K27ac + S28p          |
| 0.254 | 0.095 | H3K23ac                                 |
| 0.678 | 0.092 | H3R2me2s + K4me3 + K9ac + K14ac + K18ac |
| 0.433 | 0.085 | H3R8me1 + K9me3                         |
| 0.497 | 0.109 | H3R8me1 + K9me2                         |
| 0.350 | 0.094 | H3R8me2a + K9me3                        |
| 0.232 | 0.115 | H3R8me2a + K9me2                        |
| 0.233 | 0.088 | H3R8me2a + K9me1                        |

|       |       |                                |
|-------|-------|--------------------------------|
| 0.283 | 0.109 | H3R8me2s + K9me3               |
| 0.360 | 0.107 | H3R8me2s + K9me2               |
| 0.275 | 0.086 | H3R8me2s + K9me1               |
| 0.263 | 0.100 | H3K4ac + K9me2 + K14ac + K18ac |
| 0.278 | 0.101 | H3K4ac + K9me1 + K14ac + K18ac |
| 0.312 | 0.107 | H3K27me3                       |
| 0.189 | 0.086 | H3K27me2                       |
| 0.279 | 0.103 | H3K27me1                       |
| 0.230 | 0.108 | H3R26me2a + K27me3             |
| 0.179 | 0.100 | H3R26me2a + K27me1             |
| 0.306 | 0.105 | H3 15-34                       |
| 0.348 | 0.143 | H3 30-49                       |
| 0.183 | 0.089 | H3 105-124                     |
| 0.225 | 0.052 | H3.3 15-34                     |
| 0.279 | 0.098 | H3.3 30-49                     |
| 0.338 | 0.064 | H3.3 75-94                     |
| 0.406 | 0.118 | H3 120-135                     |
| 0.161 | 0.057 | H3 15-34                       |
| 0.241 | 0.120 | H3K9-Nle (1-20)                |
| 0.372 | 0.092 | H3K14-Nle (1-20)               |
| 0.232 | 0.115 | H3K18-Nle (11-26)              |
| 0.223 | 0.103 | H3K23-Nle (15-31)              |
| 0.233 | 0.099 | H3T6p + K9me3                  |
| 0.244 | 0.104 | H3T6p + R8me2a + K9me3         |
| 0.217 | 0.092 | H3R26me2a                      |
| 0.413 | 0.109 | H3K27me3 + S28p                |
| 0.346 | 0.096 | H3K27me2 + S28p                |
| 0.317 | 0.118 | H3K4ac + K9me3                 |
| 0.255 | 0.124 | H3K9me2 (1-32)                 |
| 0.344 | 0.120 | H3K9me2 + K27me1 (1-32)        |
| 0.269 | 0.083 | H3K27ac                        |
| 0.317 | 0.077 | H3K27ac + S28p                 |
| 0.396 | 0.116 | H3S28p                         |
| 0.322 | 0.112 | H3 (1-20) N-ac                 |
| 0.355 | 0.102 | H3 (52-61)                     |
| 0.249 | 0.057 | H3K56ac (52-61)                |
| 0.189 | 0.052 | H3K56me3 (52-61)               |
| 0.223 | 0.108 | H3K9me2 (1-15)                 |
| 0.536 | 0.118 | H3K4me2 + K9me2                |
| 0.554 | 0.113 | H3K4me1 + K9me2                |
| 0.550 | 0.094 | H3K4me3 + K9me2                |
| 0.155 | 0.116 | H3K4A + K9me2 (1-15)           |
| 0.240 | 0.091 | H2A (1-17)                     |
| 0.235 | 0.087 | H2AK5ac + K9ac + K13ac + K15ac |
| 0.236 | 0.112 | H2AK5ac                        |
| 0.368 | 0.092 | H2AS1p + K5ac                  |
| 0.360 | 0.114 | H2AR3me2a + K5ac               |
| 0.273 | 0.103 | H2AS1p + R3me2a + K5ac         |

|       |       |                                                |
|-------|-------|------------------------------------------------|
| 0.168 | 0.123 | H2ACit3 + K5ac                                 |
| 0.144 | 0.081 | H2AS1p + Cit3 + K5ac                           |
| 0.208 | 0.093 | H2AS1p + K5ac + K9ac + K13ac + K15ac           |
| 0.303 | 0.069 | H2AK5ac + K9ac + K13ac + K15ac (no N-ac)       |
| 0.240 | 0.109 | H2AS1p + K5ac + K9ac + K13ac + K15ac (no N-ac) |
| 0.179 | 0.111 | H2AX (132-142)                                 |
| 0.208 | 0.119 | H2AX (S139p)                                   |
| 0.278 | 0.113 | H2A.Z (1-19)                                   |
| 0.264 | 0.123 | H2A.Z (1-19) N-ac                              |
| 0.206 | 0.095 | H2A.Z K4ac + K8ac + K12ac (1-19)               |
| 0.269 | 0.078 | H2A.Z K4ac + K8ac + K12ac (1-19) N-ac          |
| 0.316 | 0.118 | H3Cit8 (1-21)                                  |
| 0.388 | 0.116 | H3 (21-44)                                     |
| 0.255 | 0.080 | H3K36me1 (21-44)                               |
| 0.334 | 0.093 | H3K36me2 (21-44)                               |
| 0.341 | 0.077 | H3K36me3 (21-44)                               |
| 0.301 | 0.140 | H3K36ac (21-44)                                |
| 0.216 | 0.118 | H3K27acK36me1 (21-44)                          |
| 0.367 | 0.083 | H3K27acK36me2 (21-44)                          |
| 0.170 | 0.095 | H3K27acK36me3 (21-44)                          |
| 0.172 | 0.059 | H2BK120ub1 (Leu-Arg-Gly-Gly) (108-125)         |
| 0.174 | 0.120 | H2B (108-125)                                  |
| 0.294 | 0.081 | H4 (1-25)                                      |
| 0.357 | 0.080 | H4K20me3 (1-23)                                |
| 0.284 | 0.082 | H4K12acK16acK20me3 (1-25)                      |
| 0.208 | 0.083 | H4R3me2a + K5ac                                |
| 0.353 | 0.061 | H4 (1-23) (no N-ac)                            |
| 0.420 | 0.039 | H4K20ac                                        |
| 0.201 | 0.076 | H4S1p + K5ac + K8ac + K12ac + K16ac            |
| 0.320 | 0.088 | H4S1p (1-23)                                   |
| 0.254 | 0.118 | H4K5ac + K8ac                                  |
| 0.253 | 0.080 | H4K5ac + K16ac                                 |
| 0.332 | 0.068 | H4K5ac + K20ac                                 |
| 0.189 | 0.105 | H4K8ac + K12ac                                 |
| 0.356 | 0.059 | H4K8ac + K20ac                                 |
| 0.219 | 0.063 | H4K12ac + K16ac                                |
| 0.213 | 0.109 | H4K12ac + K20ac                                |
| 0.390 | 0.051 | H4K16ac + K20ac                                |
| 0.334 | 0.108 | H4K12ac + KQ5,8,16,20                          |
| 0.231 | 0.115 | H4K5me1                                        |
| 0.283 | 0.118 | H4K8me1                                        |
| 0.347 | 0.110 | H4K12me1                                       |
| 0.386 | 0.071 | H4K5ac + K8me1 + K12ac                         |
| 0.337 | 0.113 | H4K5me1 + K8ac + K12me1                        |
| 0.359 | 0.091 | H4K5me1 + K8me1 + K12me1                       |
| 0.329 | 0.111 | H4K8ac + K12ac + K16ac                         |
| 0.320 | 0.116 | H4K5ac + K12ac + K16ac                         |
| 0.239 | 0.120 | H4K5ac + K8ac + K16ac                          |

|       |       |                                  |
|-------|-------|----------------------------------|
| 0.161 | 0.105 | H4K5me1 + K8ac + K12ac + K16ac   |
| 0.245 | 0.097 | H4K5ac + K8me1 + K12ac + K16ac   |
| 0.263 | 0.102 | H4K5ac + K8ac + K12me1 + K16ac   |
| 0.387 | 0.094 | H2B (1-24)                       |
| 0.428 | 0.118 | H2BK5me3                         |
| 0.349 | 0.079 | H2BK5me2                         |
| 0.219 | 0.089 | H2BK5me1                         |
| 0.238 | 0.099 | H2BK12ac                         |
| 0.365 | 0.097 | H2BK15ac                         |
| 0.277 | 0.096 | H2BK16ac                         |
| 0.397 | 0.117 | H2BK20ac                         |
| 0.224 | 0.057 | H2BK12ac + K15ac + K16ac + K20ac |
| 0.168 | 0.077 | γH2A (10-25)                     |
| 0.184 | 0.118 | H2A (10-25)                      |
| 0.207 | 0.098 | H2A.X (1-17)                     |
| 0.246 | 0.118 | H2A.X K5ac                       |
| 0.694 | 0.188 | H3K4me3 (1-11)                   |
| 0.407 | 0.089 | H3K4me3 (1-7)                    |
| 0.275 | 0.095 | H3K36me3                         |
| 0.392 | 0.095 | H3S31p + K36me3                  |
| 0.273 | 0.117 | H3K23me3 (15-34)                 |
| 0.080 | 0.066 | H3K23me2 (15-34)                 |
